# Supplementary material
Source: Springer Nature journal article supplement (https://www.springermedizin.de/resource/supplementary/12889_2008_1436_MOESM2_ESM.pdf/9503850)

**FDep99 index**

**SMR (all-causes)**

**Région scale**

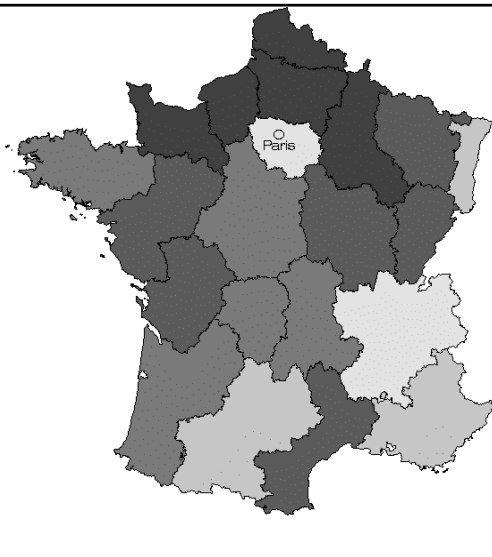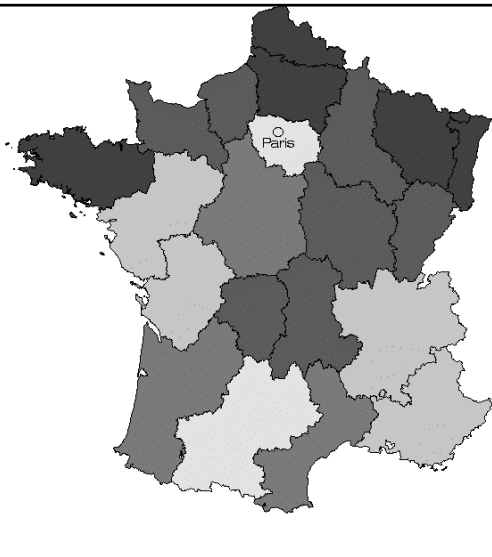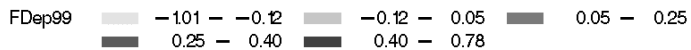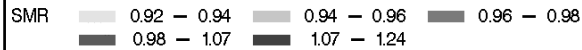

**Canton scale**

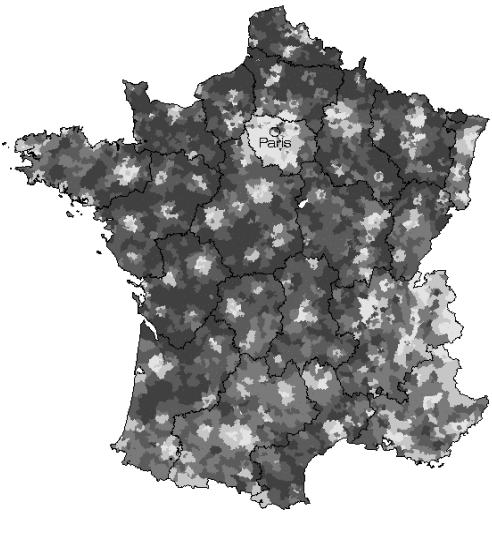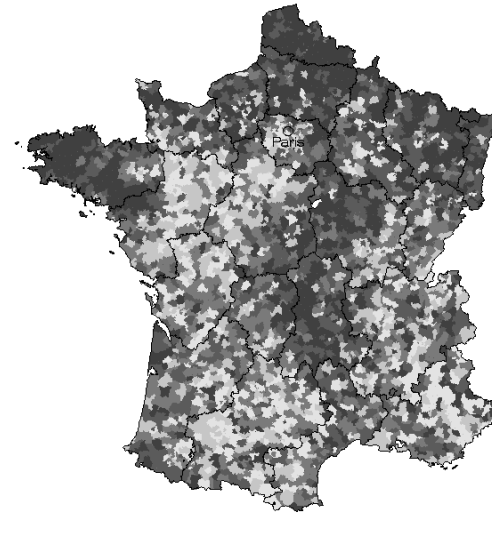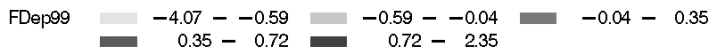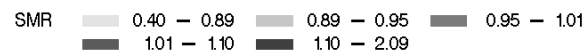

Supplement: MOESM2 [file 9503850]
